# Supplementary material for: Evolutionary conserved NSL complex/BRD4 axis controls transcription activation via histone acetylation
Source: PubMed Central journal article supplement (PMC7206058; doi:10.1038/s41467-020-16103-0), 2020-05-07
Supplement: 41467_2020_16103_MOESM3_ESM.pdf [file 41467_2020_16103_MOESM3_ESM.pdf]

## **Description of Additional Supplementary Files**

File Name: Supplementary Data 1

Description: Scores of genome wide RNAi screen.

File Name: Supplementary Data 2

Description: List of differentially expressed (DE) genes obtained in RNA-seq from Drosophila S2 cells and human fibroblast cell lines.

File Name: Supplementary Data 3

Description: Table with primer sequences.
